# Supplementary material for: Different genetic mechanisms mediate spontaneous versus UVR-induced malignant melanoma
Source: eLife. 2019 Jan 25;8:e42424. doi: 10.7554/eLife.42424 (PMC6428585; doi:10.7554/eLife.42424)
Supplement: Supplementary file 4. — To generate interconnected networks based on correlations, gene lists were clustered using STRING (http://string-db.org/) based on the top 500 genes differentially under or overexpressed after neonatal UVR exposure. The terms are sorted by their enrichment value shown as statistically in terms of false discovery rate. [file elife-42424-supp4.xls]

## Sheet: UV pathways
		Skin - 6 hr post UV
#pathway ID	pathway description	observed gene count	false discovery rate	matching proteins in your network (labels)
3008	Ribosome biogenesis	14	7e-05	Cirh1a,Eif6,Emg1,Fcf1,Gnl2,Heatr1,Nol6,Nop58,Pop1,Pwp2,Riok1,Rpp38,Taf9,Utp15
1100	Metabolic pathways	72	0.000306	Acaa2,Acad8,Acadm,Adh1,Adh7,Adk,Ahcyl2,Akr1b8,Aldh5a1,Alg14,Alox12e,Alox5,Atp6v0a1,Cbs,Chpf,Cox6b2,Cyp2b10,Cyp3a13,Ext1,Extl1,Extl2,Fpgs,Gal3st1,Galnt1,Galnt10,Galnt3,Galt,Gch1,Glb1,Gldc,Gyk,Hk1,Hlcs,Hmgcr,Hmgcs2,Inpp5a,Ippk,Lass2,Lass6,Lpcat2,Man1c1,Man2a1,Maob,Mat2a,Mccc2,Mcee,Mmab,Mthfd2,Nme7,Odc1,Pfkm,Pfkp,Pgam1,Phgdh,Pik3c3,Pla2g4e,Polr1c,Polr1e,Polr2a,Ppat,Ptges,Pygl,St3gal2,Suclg2,Tpk1,Twi…
52	Galactose metabolism	7	0.00889	Akr1b8,Galt,Glb1,Hk1,Pfkm,Pfkp,Ugp2
		Skin - 10h
#pathway ID	pathway description	observed gene count	false discovery rate	matching proteins in your network (labels)
3030	DNA replication	9	0.000384	Fen1,Lig1,Mcm2,Mcm3,Mcm5,Mcm6,Mcm7,Pold1,Rfc4
4115	p53 signaling pathway	10	0.0076	Apaf1,Bax,Bbc3,Ccne2,Ccng1,Cd82,Gtse1,Rrm2,Sesn1,Thbs1
1100	Metabolic pathways	62	0.026	A4galt,Acsl6,Acss1,Adh1,Adk,Adssl1,Agxt2l2,Akr1b8,Aldh1a3,Alox12e,Anpep,Aprt,Arsb,Cbr3,Cryl1,Cyp2b10,Cyp3a13,Dcxr,Degs2,Eno1,Gal3st1,Galnt10,Ganc,Gapdhs,Gldc,Gls2,Gmds,Gyk,Hmgcs2,Hprt,Idi2,Inpp5a,Man2a1,Maob,Mgat4a,Ndufa5,Ndufb9,Nme4,Nme7,Odc1,Papss2,Pcca,Pccb,Pgam1,Pik3c2g,Pla2g4d,Pold1,Polr2a,Ptges,Pygl,Rpe,Rrm2,St3gal2,St6gal1,Suclg2,Tpk1,Tyrp1,Uck1,Ugt1a6b,Ugt1a7c,Upp1,Urah
4724	Glutamatergic synapse	12	0.026	Gls2,Gnaq,Gng13,Gng7,Itpr1,Itpr2,Pla2g4d,Ppp3ca,Prkca,Prkcb,Slc1a3,Slc38a3
980	Metabolism of xenobiotics by cytochrome P450	8	0.0475	Adh1,Aldh1a3,Cbr3,Cyp2f2,Ephx1,Gsta4,Ugt1a6b,Ugt1a7c
		Skin -24 h after UV
#pathway ID	pathway description	observed gene count	false discovery rate	matching proteins in your network (labels)
4151	PI3K-Akt signaling pathway	31	0.000203	Angpt2,Ccnd1,Eif4ebp1,G6pc3,Gng4,Gng7,Il6ra,Itga3,Itga5,Itga6,Itga7,Itgb4,Itgb6,Jak2,Lama3,Lamc2,Mdm2,Myc,Ngf,Osm,Osmr,Pdgfb,Pik3r2,Ppp2r5e,Raf1,Rxra,Thbs2,Thbs3,Tlr2,Tnc,Tnxb
4510	Focal adhesion	22	0.000203	Capn2,Ccnd1,Dock1,Itga3,Itga5,Itga6,Itga7,Itgb4,Itgb6,Lama3,Lamc2,Myl12a,Pdgfb,Pik3r2,Prkcb,Pxn,Raf1,Src,Thbs2,Thbs3,Tnc,Tnxb
4512	ECM-receptor interaction	14	0.000203	Cd44,Cd47,Itga3,Itga5,Itga6,Itga7,Itgb4,Itgb6,Lama3,Lamc2,Thbs2,Thbs3,Tnc,Tnxb
5205	Proteoglycans in cancer	23	0.000203	Arhgef1,Ccnd1,Cd44,Cd63,Gpc1,Gpc3,Hcls1,Itga5,Itpr2,Mdm2,Myc,Pik3r2,Plaur,Prkcb,Pxn,Raf1,Src,Tgfb1,Tlr2,Wnt10b,Wnt16,Wnt4,Wnt7b
1100	Metabolic pathways	72	0.000365	A4galt,Acsbg1,Acsl1,Acsl6,Acy3,Adh1,Agps,Agxt2l2,Akr1b8,Aldoc,Alg2,Alg8,Alox12,Aprt,Arsb,Atp6v1c2,Bcmo1,Cad,Cbr3,Cds1,Cmas,Cryl1,Cyp2b10,Cyp3a13,Dcxr,Eno1,Fam213b,Fpgs,G6pc3,Gale,Gapdhs,Gfpt1,Glb1,Gldc,Gmds,Gyk,Hpgds,Hsd17b4,Idi2,Inpp5a,Itpk1,Lass2,Mat2a,Mcee,Mtap,Mvd,Nat8l,Ndufb9,Odc1,Pccb,Pfkm,Pigf,Pigw,Pik3c2g,Pla2g3,Pla2g4e,Pla2g5,Polr1b,Ppat,Prodh,Ptges,Ptgs1,Sord,Sphk2,Srm,St3gal2,Tm7sf2,Tp…
4810	Regulation of actin cytoskel	21	0.000722	Arhgef1,Arhgef6,Arpc1b,Dock1,Itga3,Itga5,Itga6,Itga7,Itgae,Itgb4,Itgb6,Limk1,Myh9,Myl12a,Nckap1l,Pdgfb,Pik3r2,Pxn,Raf1,Src,Was
		72h epidermis
#pathway ID	pathway description	observed gene count	false discovery rate	matching proteins in your network (labels)
4612	Antigen processing	14	1.38e-05	Cd74,Cd8b1,Ciita,Ctsl,H2-Aa,H2-Ab1,H2-DMa,H2-DMb1,H2-DMb2,H2-Eb1,H2-M2,Lgmn,Nfyc,Tnf
5310	Asthma	8	4.4e-05	Fcer1g,H2-Aa,H2-Ab1,H2-DMa,H2-DMb1,H2-DMb2,H2-Eb1,Tnf
5140	Leishmaniasis	12	6.3e-05	Cyba,H2-Aa,H2-Ab1,H2-DMa,H2-DMb1,H2-DMb2,H2-Eb1,Map3k7,Ncf4,Prkcb,Tab1,Tnf
4142	Lysosome	15	0.000521	Atp6v0a1,Cd63,Ctsa,Ctsl,Ctsw,Gnptg,Hgsnat,Laptm5,Lgmn,Man2b1,Manba,Napsa,Npc2,Ppt1,Scarb2
5330	Allograft rejection	9	0.000661	Cd86,H2-Aa,H2-Ab1,H2-DMa,H2-DMb1,H2-DMb2,H2-Eb1,H2-M2,Tnf
4145	Phagosome	17	0.000679	Atp6v0a1,Coro1a,Ctsl,Cyba,H2-Aa,H2-Ab1,H2-DMa,H2-DMb1,H2-DMb2,H2-Eb1,H2-M2,Ncf4,Sec61g,Thbs3,Tubb2b,Tubb6,Vamp3
5332	Graft-versus-host disease	9	0.000679	Cd86,H2-Aa,H2-Ab1,H2-DMa,H2-DMb1,H2-DMb2,H2-Eb1,H2-M2,Tnf
		72h dermis
#pathway ID	pathway description	observed gene count	false discovery rate	matching proteins in your network (labels)
5205	Proteoglycans in cancer	17	0.014	Akt2,Braf,Camk2d,Cblb,Ccnd1,Ctnnb1,Cttn,Fas,Fgf12,Hspg2,Mapk13,Pik3r1,Thbs1,Tlr4,Wnt10a,Wnt3a,Wnt5a
5200	Pathways in cancer	20	0.0307	Abl1,Akt2,Bcl2,Bid,Bmp4,Braf,Cblb,Ccnd1,Col4a2,Ctnnb1,Dapk3,Fas,Fgf12,Hdac2,Pik3r1,Ralgds,Traf4,Wnt10a,Wnt3a,Wnt5a
5152	Tuberculosis	13	0.0406	Akt2,Bcl2,Bid,Camk2d,Cd14,Cd74,Fcgr1,H2-Aa,Irak2,Mapk13,Sphk1,Tcirg1,Tlr4
